# Supplementary material
Source: PubMed Central journal article supplement (PMC3285336)

## Supplemental Information

**Figure S1.** Time-course analysis of p63 or MYC expression after siP63 or siMYC transfection. (A, B) p63 expression levels were quantified using qRT-PCR (A) and western blots (B) over the course of 10 days. (C) MYC expression levels in p63-knockdown cells were quantified using qRT-PCR. (D) MYC expression levels in siMYC were quantified by qRT-PCR and western blots (E) over the course of 10 days. Samples were extracted every 2 days from day 2 to day 10.

**Figure S2.** MYC expression in p63-depleted keratinocytes in mRNA level (A) and protein level (B). BR means biological replicate.

**Figure S3.** Genetic networks regulating cell cycle (A) and cell migration and adhesion (B) were generated by Ingenuity Pathway Analysis (IPA) for siMYC. Same networks as identified in siP63.

**Figure S4.** Data mining of MYC expression in GEO. Other MYC expression data were found in GEO, with p63 knockdown in several epithelial cell lines.

**Figure S5.** Ectopic expression of TAp63 $\gamma$  or  $\Delta$ Np63 $\alpha$  was not able to upregulate MYC expression. HaCaT cells were transfected with plasmids containing the ORF of TAp63 $\gamma$ ,  $\Delta$ Np63 $\alpha$ , or GFP (control). 48 hours post-transfection, RNA was extracted and measured by qRT-PCR.

**Figure S6.** Gene Ontology (GO) analysis for the 546 common genes in Fig. 5a. (A-D) GO terms were significantly enriched in downregulated genes in the green columns (A, siMYC; B, siP63) or in upregulated genes in the red columns (C, siMYC; D, siP63). Significantly enriched GO

terms are represented in a histogram as the  $-\log(p < 0.05)$ , Fisher's exact test). The numbers indicated above columns represent the number of genes classified into each category. The gray dashed lines represent the significance threshold.

**Table S1.** List of all PCR primers used in this study.

**Table S2.** List of genes differentially expressed in siMYC or siP63 transcriptome analysis.

**Table S3.** List of common genes modulated inversely in the siMYC and siP63 transcriptomes.

Figure S1

**A**

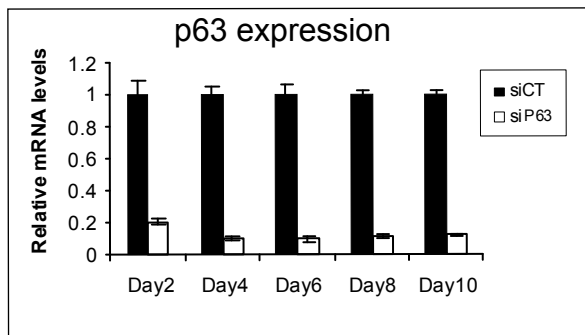

**B**

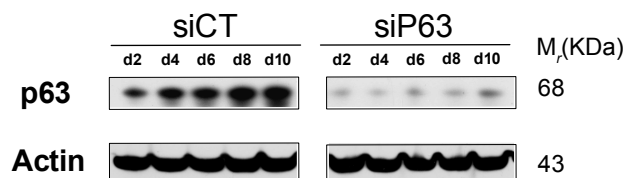

**C**

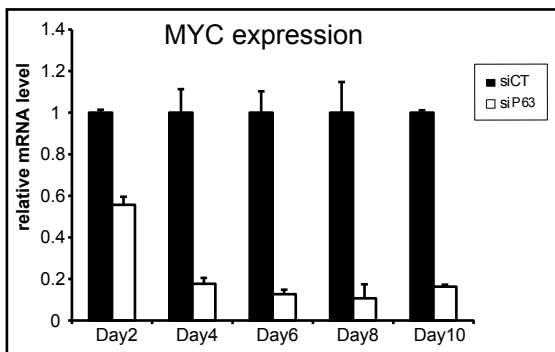

**D**

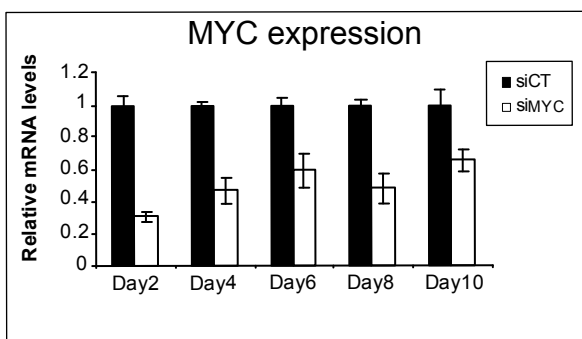

**E**

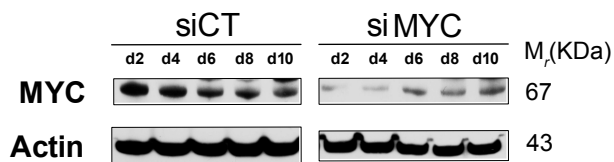

Figure S2

A

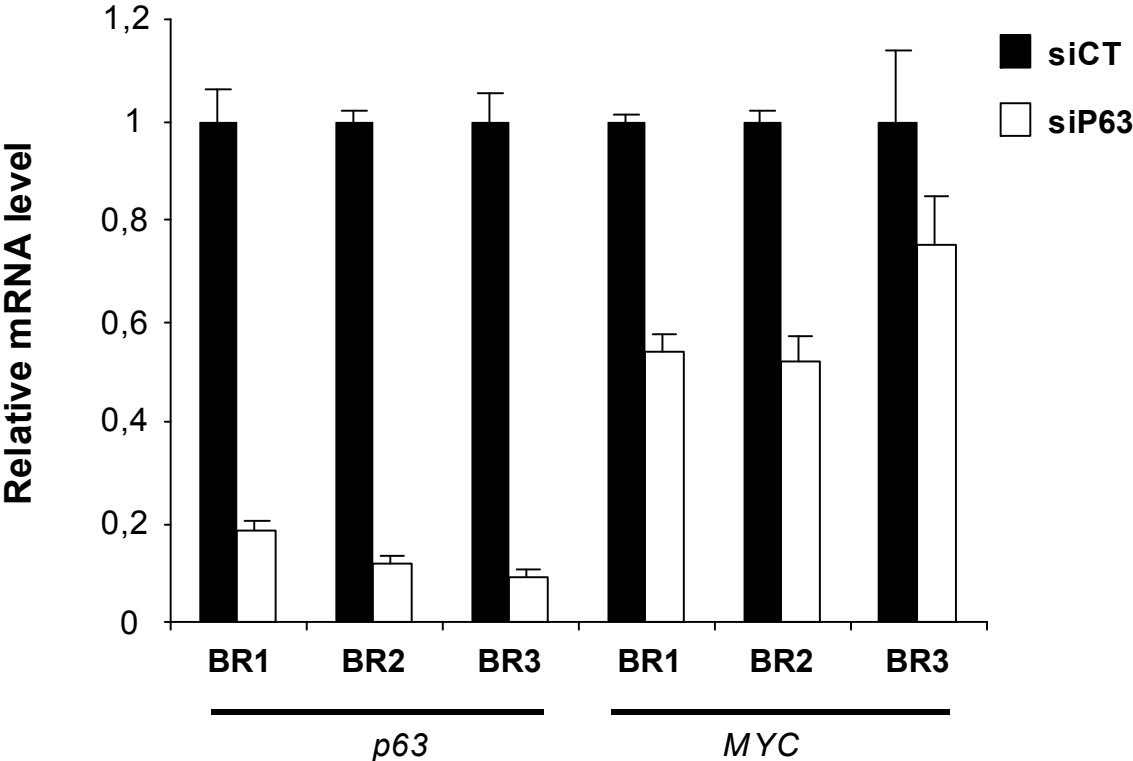

B

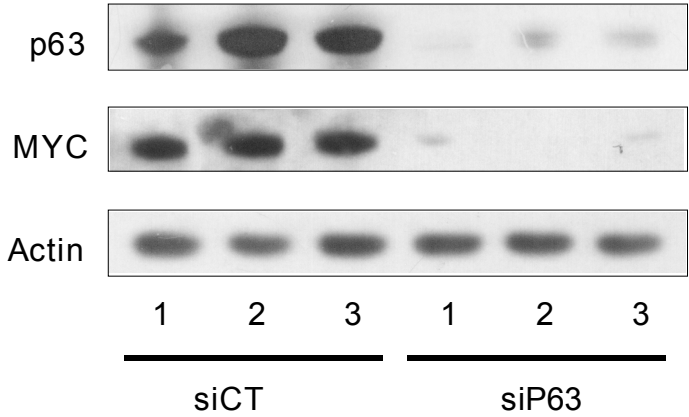

Figure S3

A

siMYC

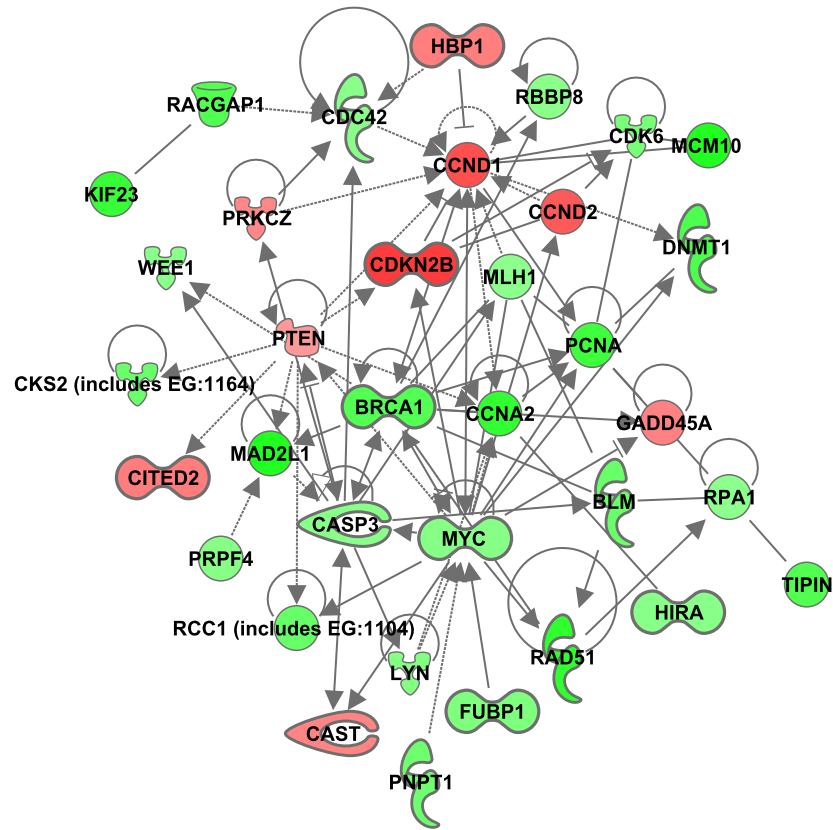

Cell Cycle

B

siMYC

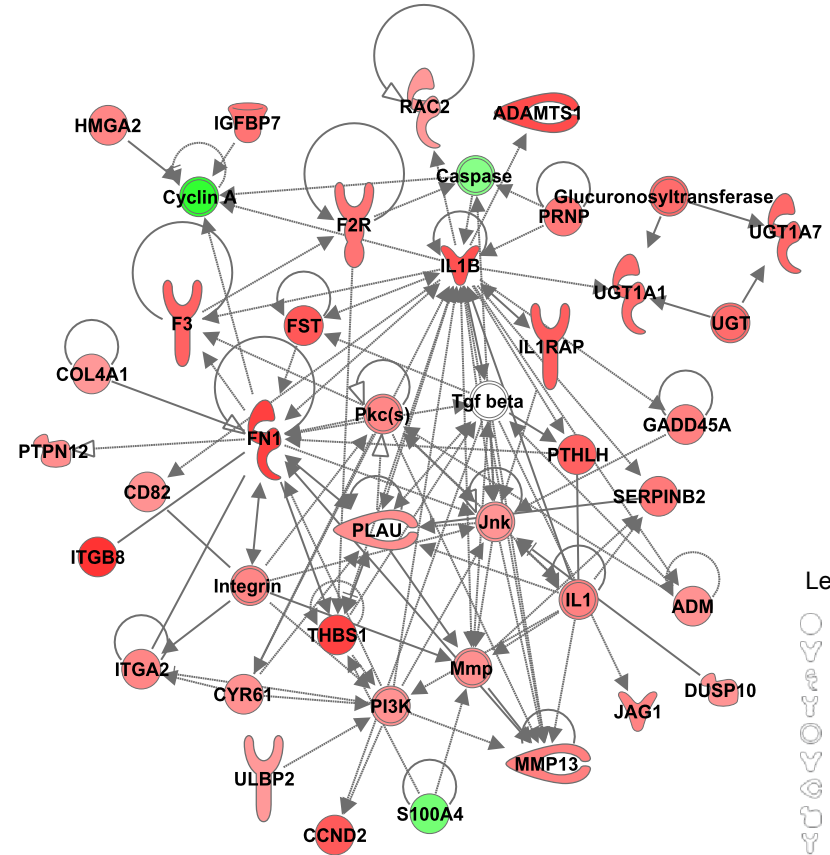

Cell migration/adhesion

Legends

- Complex
- Cytokine/Growth Factor
- Enzyme
- G-protein Coupled Receptor
- Group/Complex/Other
- Growth factor
- Peptidase
- Phosphatase
- Transmembrane Receptor
- Transporter
- Unknown
- Direct Interactions
- Indirect Interactions

Figure S4

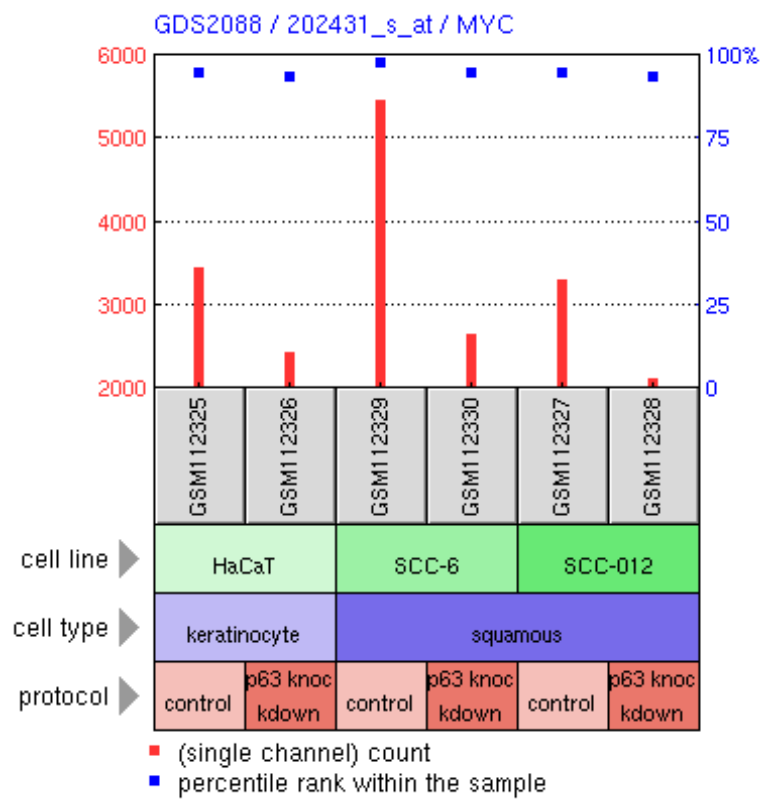

GSM112325: HaCaT cells transfected with control vector  
 GSM112326: HaCaT cells transfected with p63 siRNA  
 GSM112329: SCC-6 cells transfected with control vector  
 GSM112330: SCC-6 cells transfected with p63 siRNA  
 GSM112327: SCC-012 cells transfected with control vector  
 GSM112328: SCC-012 cells transfected with p63 siRNA

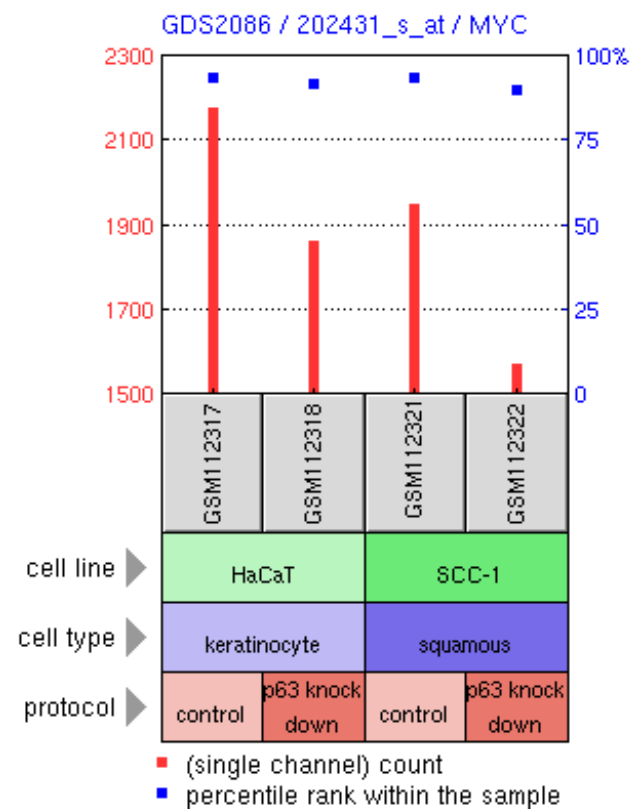

GSM112317: HaCaT RG cells transfected with control vector 1  
 GSM112318: HaCaT RG cells transfected with p63 siRNA 1  
 GSM112321: SCC-1 cells transfected with control vector 1  
 GSM112322: SCC-1 cells transfected with p63 siRNA 1

Figure S5

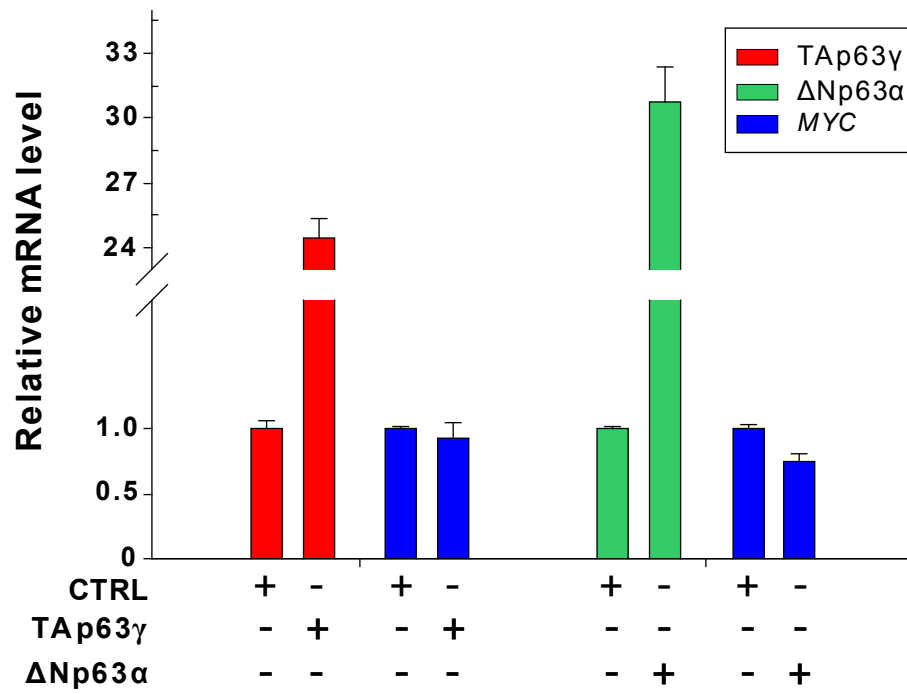

Figure S6

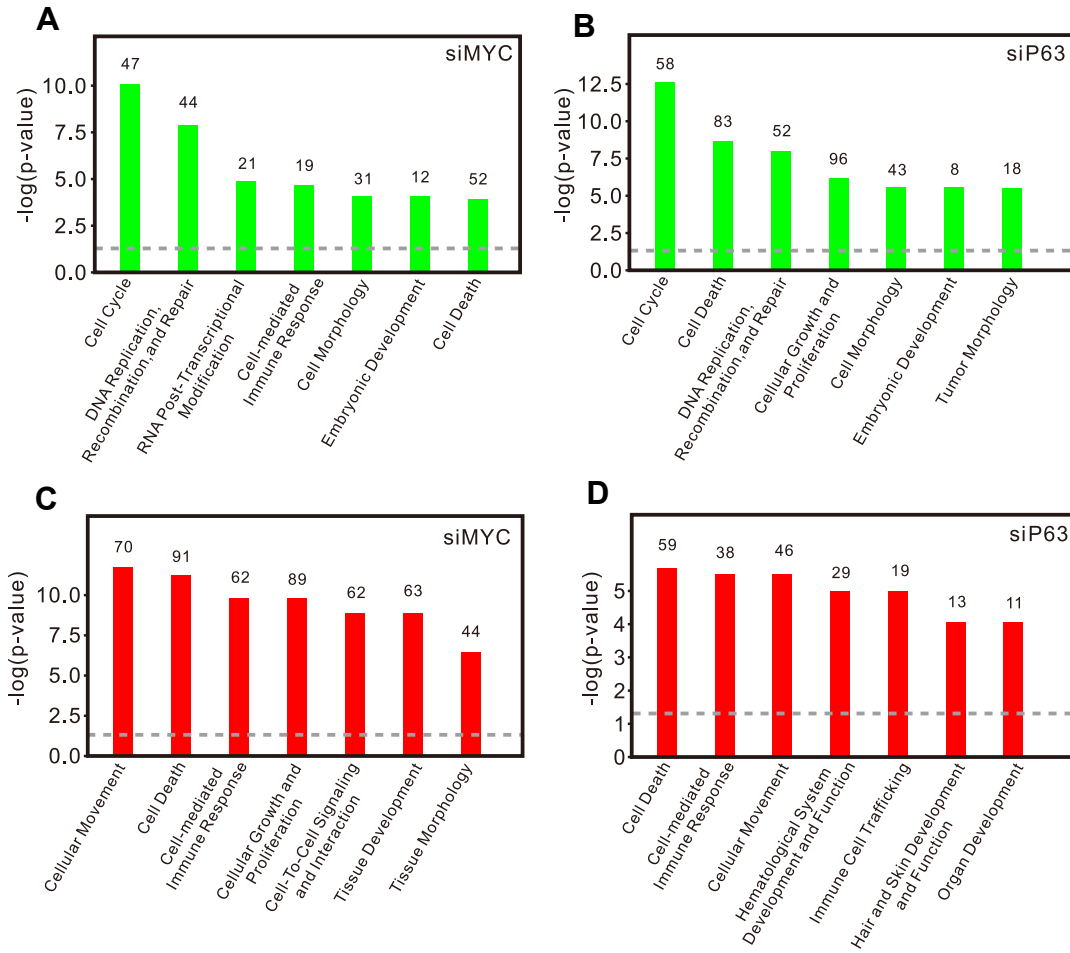

Supplement: supp_M111.328120_jbc.M111.328120-1.pdf [file supp_M111.328120_jbc.M111.328120-1.pdf]
